# Supplementary material for: Role of intermolecular charge delocalization and its dimensionality in efficient band-like electron transport in crystalline 2,5-difluoro-7,7,8,8-tetracyanoquinodimethane (F2-TCNQ)
Source: Royal Society of Chemistry journal article supplement (doi:10.1039/c7cp04357k), 2017-01-01
Supplement: c7cp04357k1.pdf [file c7cp04357k1.pdf]

# Role of intermolecular charge delocalization and its dimensionality in efficient band-like electron transport in crystalline 2,5-difluoro- 7,7,8,8-tetracyanoquinodimethane (F<sub>2</sub>-TCNQ)

Andrey Yu. Sosorev\*

## Supporting information

### 1. Transfer integrals within two calculation approaches

To verify our realization of the dimer projection (DIPRO) approach for the calculation of electron transfer integrals,  $J$ , the latter were also computed using energy-splitting-in-dimer (ESID) method, which is rigorous for symmetric dimers (i.e. in which the molecules are in equivalent positions). Table S1 collates the  $J$  values calculated using DIPRO and ESID approaches for symmetric dimers of TCNQ, F<sub>2</sub>-TCNQ and F<sub>4</sub>-TCNQ. The difference between the corresponding values obtained by the two methods does not exceed 7 meV (11%) for TCNQ, 4 meV (8%) for F<sub>2</sub>-TCNQ and 8 meV (30%) for F<sub>4</sub>-TCNQ. Reasonable coincidence of the values obtained by the two methods confirms the validity of the DIPRO-based approach for  $J$  calculation and its implementation in the current study.

| Compound     |       | TCNQ      |           |          | F <sub>2</sub> -TCNQ |            |           |           |           |          | F <sub>4</sub> -TCNQ |          |
|--------------|-------|-----------|-----------|----------|----------------------|------------|-----------|-----------|-----------|----------|----------------------|----------|
| Dimer type   |       | <i>PI</i> | <i>P2</i> | <i>S</i> | <i>PL1</i>           | <i>PL2</i> | <i>PI</i> | <i>P2</i> | <i>SI</i> | <i>L</i> | <i>S2</i>            | <i>P</i> |
| $J$ ,<br>meV | DIPRO | 66        | 15        | 9        | 68                   | 67         | 51        | 49        | 11        | 4        | 0                    | 27       |
|              | ESID  | 59        | 12        | 1.5      | 64                   | 63         | 46        | 45        | 11        | 4        | 0                    | 19       |

Table S1. Electron transfer integrals  $J$  calculated using dimer projection (DIPRO) and energy-splitting-in-dimer (ESID) methods for F<sub>2</sub>-TCNQ

## 2. Impact of basis set on transfer integrals and reorganization energy

### 2.1. Transfer integrals

Calculation of  $J$  in our current implementation of DIPRO method is not straightforward for large basis sets with diffuse functions; therefore, basis set 6-31g(d) was used for this task in the current study. The effect of basis set expansion on  $J$  values can be seen from Table S2 that presents the  $J$  values for the F<sub>2</sub>-TCNQ crystal calculated using ESID method and different basis sets. The variation of  $J$  does not exceed 4 meV, and we conclude that the basis set used in this study, 6-31g(d), provides sufficiently accurate estimation of  $J$ .

| Dimer type | $J, meV$ |            |           |              |
|------------|----------|------------|-----------|--------------|
|            | 6-31g(d) | 6-31g(d,p) | 6-31+g(d) | 6-311+g(d,p) |
| PL         | 62.5     | 62.5       | 61        | 61           |
| P1,P2      | 45       | 45         | 45        | 46           |
| S1         | 11       | 11         | 15        | 15           |
| L          | 4        | 4          | 5         | 5            |
| S2         | 0        | 0          | 1.5       | 0            |

Table S2. Values of electron transfer integrals for F<sub>2</sub>-TCNQ crystal calculated using different basis sets.

### 2.2. Reorganization energy for isolated molecules

| Basis set     | $\lambda, meV$ |                      |
|---------------|----------------|----------------------|
|               | TCNQ           | F <sub>2</sub> -TCNQ |
| 6-31g         | 237            | 230                  |
| 6-31g(d)      | 248            | 253                  |
| 6-31g(d,p)    | 248            | 254                  |
| 6-31+g(d)     | 250            | 258                  |
| 6-31g+(d,p)   | 250            | 258                  |
| 6-31g++(d,p)  | 250            | 258                  |
| 6-311g(d,p)   | 257            | 265                  |
| 6-311+g(d,p)  | 260            | 269                  |
| 6-311g++(d,p) | 260            | 269                  |

Table S3. Reorganization energy for isolated molecules of TCNQ and F<sub>2</sub>-TCNQ in different basis sets

Table S3 illustrates the effect of the basis set on the reorganization energy  $\lambda$  of isolated TCNQ and F<sub>2</sub>-TCNQ molecules. The difference in  $\lambda$  between basis sets 6-31g and 6-311++g(dp) amounts ca 15%. This variation can not alter the conclusions of the current study.

### 2.3. Reorganization energy considering crystal environment

The effect of the basis set on  $\lambda$  values calculated considering crystal environment is illustrated in Table S4 for crystalline F<sub>2</sub>-TCNQ. In both the 6-31g and 6-31+g(d) basis sets,  $\lambda$  in the selected PL dimer (see Chart 1 of the main text) amounts ca. 68% of that in single molecule. Similar variation of  $\lambda$  value for the two basis sets allow us to suggest that the qualitative results obtained in this study using relatively small 6-31g basis set are reliable.

| <i>Molecular system</i>    | <i><math>\lambda</math>, meV</i> |                  |
|----------------------------|----------------------------------|------------------|
|                            | <i>6-31g</i>                     | <i>6-31+g(d)</i> |
| Isolated molecule          | 230                              | 258              |
| Single molecule in crystal | 240                              | 263              |
| Dimer                      | 164                              | 180              |

Table S4. Reorganization energy for F<sub>2</sub>-TCNQ single molecule and dimer in different basis sets.
